# Supplementary material
Source: PubMed Central journal article supplement (PMC4874530)
Supplement: NIHMS776094-supplement-Supp_Table1.pdf [file NIHMS776094-supplement-Supp_Table1.pdf]

| <b>DMR</b>        | <b>Forward primer</b> | <b>Reverse Primer</b> |
|-------------------|-----------------------|-----------------------|
| KCTD16-associated | AGGGCGAGGCTTCTAGTGA   | TCCTTTCAGGTCCACCTTTG  |
| GOLGB1-associated | GCAGTCGTACGAGAACGTGA  | ATCCTGCAGCTGCTTCTCTC  |
| SNW1-proximal     | ACTTTTTCCCCTCCATCGAC  | ACTACTGAGAGCCCCGGAAT  |
| GLRa1-associated  | GAGCAGCAGGTGAGTGACAG  | AGAGAGATGGAGGAGGTGAGG |
| CDH13-associated  | TGCCTACCTGTGCGTATGAG  | TTCCAGGCTCCTGTCCTAA   |

**Supplemental Table 1.** Primers used for the validation of select DMRs by MBD qPCR.
