# Supplementary material
Source: PubMed Central journal article supplement (PMC4874530)
Supplement: NIHMS776094-supplement-Supp_Table2.pdf [file NIHMS776094-supplement-Supp_Table2.pdf]

| Gene<br>(isoform)       | Forward primer            | Reverse primer          |
|-------------------------|---------------------------|-------------------------|
| Cdh13 (all)             | CCTGTCCTAAACTTGACC        | GAGTTCTGCCATGTCTTC      |
| Cdh13<br>(001, 003-006) | CTGCTGTCCCAGGTGCTC        | TGAAGGTCAAGTTTAGGACAGG  |
| Cpeb4 (all)             | AGGATAAACCCAGTGCAGATCC    | GAGCCATCCATCACAAAGTC    |
| Cpeb4 (001)             | GCGAAGGAGAGGTCAGTC        | CTGGTGAGTGAAGCAGTGAG    |
| Gira1 (all)             | CGGAATGGCAATGTCCTCTAC     | GAGTTGCATGATACACGTCTGT  |
| Golgb1 (all)            | CTTCCTCAGACGCTGACTC       | CAGCTCCACCACTAACTTCT    |
| Kctd16 (all)            | TCTTCTATCGTGAGCCTTCC      | CAGGTCACTTTTCCGCCTCAT   |
| Mctp1 (all)             | CCACAAGAACCTAAATCCTGTGT   | AAAGGCTGAGCCCATAAAGTC   |
| Mctp1 (001)             | CAGGCTCTGCAGAAGGACAT      | CTGGTACATTCCGGGATCAG    |
| Nkain3 (all)            | TGCTCGCTGGTCTGTCTCT       | ACACCATGATGTAACGTGGTCTA |
| Snw1 (all)              | GCTCACCAGCTTTTTACCTGC     | GCTCCCTTCGAGAGGAGAC     |
| Dynenin                 | GGACATTGCTGCCTATATCAAGAAG | CGTGTGTGACATAGCTGCCAA   |

**Supplemental Table 2.** Primers used for quantification of mRNA expression by qPCR.

Primers were designed by primer3, AutoPrime or retrieved from PrimerBank. In the case of isoforms, “all” refers to the fact that the primer amplifies all the isoforms of the gene overlapped by the corresponding DMR, but not necessarily all isoforms of the gene itself.
