# Supplementary material
Source: PubMed Central journal article supplement (PMC4874530)
Supplement: NIHMS776094-supplement-Supp_Table_3.pdf [file NIHMS776094-supplement-Supp_Table_3.pdf]

| Chr | Location  | Overlapped gene              | Left gene (distance)  | Right gene (distance)    | Genomic region         |
|-----|-----------|------------------------------|-----------------------|--------------------------|------------------------|
| 4   | 3010811   | None                         | N/A<br>(centromere)   | Vmn1r2-ps2<br>(20095 bp) | Intergenic             |
| 4   | 46790936  | Gabbr2                       | Tbc1d2<br>(127855 bp) | Gm568<br>(230252 bp)     | Intronic               |
| 4   | 141306461 | Agmat                        | Ddi2<br>(27127 bp)    | Dnajc16<br>(9643 bp)     | Intronic               |
| 4   | 145428809 | None                         | Gm13238<br>(908 bp)   | Gm13246-001<br>(5498 bp) | Intergenic             |
| 4   | 146141283 | Zfp600<br>Gm13165<br>Gm17452 | Gm13051<br>(47261 bp) | Gm13170<br>(4242 bp)     | Intronic<br>Non-coding |
| 4   | 146599023 | Gm16889<br>Gm17317           | Gm13163<br>(29703 bp) | Gm13147<br>(5370 bp)     | Non-coding             |
| 4   | 146711210 | Gm16889<br>Gm17317           | Gm13151<br>(3367 bp)  | Gm13145<br>(22407 bp)    | Non-coding             |
| 5   | 33068902  | Gm2420                       | Yes1<br>(79472 bp)    | Pisd<br>(10047 bp)       | Non-coding             |
| 6   | 47698472  | None                         | Y-RNA<br>(11254 bp)   | AC166252.1<br>(24856 bp) | Intergenic             |
| 6   | 103264621 | None                         | U6.880<br>(452125 bp) | Chl1<br>(196249 bp)      | Intergenic             |

|    |           |                           |                             |                              |            |
|----|-----------|---------------------------|-----------------------------|------------------------------|------------|
| 7  | 23614005  | None                      | Gm4207<br>(21673 bp)        | Vmn1r159<br>(13072)          | Intergenic |
| 7  | 46628130  | None                      | U6.424<br>(88627 bp)        | Gm5114<br>(34534)            | Intergenic |
| 7  | 148824812 | Muc6                      | Ap2a2<br>(5902 bp)          | Muc2<br>(51456)              | Exonic     |
| 8  | 14306925  | Dlgap2                    | SNORA17.403<br>(33614 bp)   | C030037F17Rik<br>(438404 bp) | Intronic   |
| 8  | 19929891  | Gm172379<br>2610005L07Rik | 6820431F20Rik<br>(36881 bp) | Gm15319<br>(3351 bp)         | Non coding |
| 8  | 73672924  | None                      | Gm17576<br>(105985 bp)      | Haus8<br>(102100 bp)         | Intergenic |
| 8  | 74324225  | None                      | Fcho1<br>(74610 bp)         | Gm5373<br>(52846 bp)         | Intergenic |
| 10 | 7233614   | None                      | 9230019H11Rik<br>(6912 bp)  | Lrp11<br>(76001 bp)          | Intergenic |
| 11 | 31822731  | Cpeb4                     | Gm12107<br>(84517 bp)       | 4930524B15Rik<br>(42861 bp)  | Intronic   |
| 11 | 53954092  | None                      | P4ha2<br>(8938 bp)          | Gm12221<br>(18336 bp)        | Intergenic |
| 12 | 88821123  | None                      | Snw1<br>(7874 bp)           | Gm2022<br>(12151 bp)         | Intergenic |

|    |           |                           |                                   |                                     |                        |
|----|-----------|---------------------------|-----------------------------------|-------------------------------------|------------------------|
| 13 | 3372770   | None                      | <b>Speer6d-ps1</b><br>(184207 bp) | <b>2810429I04Rik</b><br>(104779 bp) | Intergenic             |
| 13 | 76730298  | Mctp1                     | Gm10760<br>(207822 bp)            | <b>SNORA17.278</b><br>(13782 bp)    | Intronic               |
| 16 | 36915248  | Golgb1                    | 4930565N06Rik<br>(17973 bp)       | Hcls1<br>(19821 bp)                 | Exonic                 |
| 18 | 3005873   | None                      | None<br>(centromere)              | <b>Vmn1r-ps151</b><br>(21082 bp)    | Intergenic             |
| 18 | 40467890  | Kctd16                    | 2900055J20Rik<br>(50552 bp)       | Rps19-ps13<br>(418003 bp)           | Intronic               |
| 19 | 39341696  | <b>Cyp2c53</b><br>Cyp2c29 | Cyp2c66<br>(80134 bp)             | Cyp2c38<br>(122350 bp)              | Intronic<br>Non-coding |
| X  | 131588748 | <b>3632454L22Rik</b>      | Zmat1<br>(28917 bp)               | Gm6207<br>(65752 bp)                | Non coding             |
| X  | 166505941 | None                      | Mid1<br>(62273 bp)                | Gm15069<br>(9891 bp)                | Intergenic             |

**Supplemental Table 3. Persistent DMRs unique to cocaine self-administration.**

Chromosome (Chr) and location are derived from Ensembl Build 37 (NCBI37) with location defined as the middle of the DMR.

Black: protein coding

Blue: processed transcript

Purple: Linc RNA

Gray: transcribed processed pseudogene

Orange: transcribed unprocessed pseudogene

Pink: unprocessed pseudogene

Red: miscellaneous RNA

Green: miRNA

Turquoise: snRNA

Indigo: SNORA

\*: antisense
