# Supplementary material
Source: PubMed Central journal article supplement (PMC4874530)
Supplement: NIHMS776094-supplement-Supp_Table_4.pdf [file NIHMS776094-supplement-Supp_Table_4.pdf]

| Chr | Peak summit | Overlapped gene               | Left gene (distance)       | Right gene (distance)      | Genomic feature        |
|-----|-------------|-------------------------------|----------------------------|----------------------------|------------------------|
| 1   | 26744426    | None                          | 4931408C20Rik<br>(121 bp)  | n-R5s209<br>(271552 bp)    | Promoter               |
| 1   | 85243851    | C130026I21Rik<br>Gm16028*     | Gm7069<br>(33490 bp)       | Gm16026<br>(19422 bp)      | Intronic<br>Non-coding |
| 3   | 22163381    | None                          | RNaseP_nuc.3<br>(12796 bp) | SNORA17.487<br>(145464 bp) | Intergenic             |
| 4   | 20119038    | Nkain3                        | Ggh<br>(125141 bp)         | Gm11872*<br>(151815 bp)    | Intronic               |
| 4   | 60276939    | None                          | Mup-ps3<br>(20240 bp)      | Gm14311**<br>(97572 bp)    | Intergenic             |
| 4   | 145029937   | Gm13277                       | Gm13224**<br>(35635 bp)    | Gm13230<br>(6706 bp)       | Non-coding             |
| 4   | 145761171   | None                          | Gm13251<br>(12155 bp)      | Rex2<br>(120144 bp)        | Intergenic             |
| 4   | 146593852   | Gm16889<br>Gm17317            | Gm13163<br>(24532 bp)      | Gm13147<br>(10541 bp)      | Non-coding             |
| 4   | 146624923   | Gm16889<br>Gm17317<br>Gm13147 | Gm13163<br>(55603bp)       | Gm13158<br>(16599 bp)      | Non-coding             |
| 4   | 146847085   | Gm16889                       | Gm17317<br>(15957 bp)      | Gm13152<br>(19441 bp)      | Non-coding             |

|    |           |               |                             |                        |                        |
|----|-----------|---------------|-----------------------------|------------------------|------------------------|
| 4  | 147029598 | 2610305D13Rik | Gm13155**<br>(30604 bp)     | Gm16211<br>(13029bp)   | Intronic               |
| 5  | 15195434  | Speer7d-ps1   | 4930572O03Rik<br>(32557 bp) | Speer-4d<br>(19855 bp) | Non-coding             |
| 5  | 26425785  | 5031410I06Rik | Gm10471<br>(9954 bp)        | Gm10220<br>(16472 bp)  | 3' UTR                 |
| 5  | 95153090  | None          | Gm6025<br>(37712 bp)        | Gm3176<br>(227009 bp)  | Intergenic<br>(island) |
| 7  | 12595989  | None          | Vmn1r-ps60<br>(4430 bp)     | Vmn1r77<br>(30659 bp)  | Intergenic             |
| 8  | 20036646  | None          | 2610005L07Rik<br>(16254 bp) | None                   | Intergenic             |
| 9  | 120196465 | None          | Mobp<br>(105863 bp)         | Myrip<br>(16589 bp)    | Intergenic             |
| 10 | 7229820   | None          | 9230019H11Rik<br>(3118 bp)  | Lrp11<br>(79778 bp)    | Intergenic             |
| 10 | 7233650   | None          | 9230019H11Rik<br>(6948 bp)  | Lrp11<br>(75948 bp)    | Intergenic             |
| 11 | 55343509  | Glra1         | Gm12236*<br>(2292 bp)       | Gm12237<br>(24933 bp)  | Intronic               |
| 14 | 43641447  | None          | Gm8068<br>(17965 bp)        | Gm3102<br>(14108 bp)   | Intergenic             |
| 14 | 43981432  | Gm9732        | Gm8127                      | Gm17155                | Intronic               |

|    |           |          |                        |                          |            |
|----|-----------|----------|------------------------|--------------------------|------------|
|    |           |          | (9086 bp)              | (15276 bp)               |            |
| 15 | 75934238  | None     | Nrbp2<br>(13795 bp)    | BC024139<br>(15709 bp)   | Intergenic |
| 17 | 3082304   | Pisd-ps2 | Pisd-ps2<br>(192 bp)   | Scaf8<br>(32668 bp)      | Non-coding |
| 17 | 29240998  | None     | Cdkn1a<br>(3331 bp)    | Gm16194*<br>(10092 bp)   | Intergenic |
| 18 | 82390610  | None     | MiR5127<br>(201791 bp) | Gm17383**<br>(117556 bp) | Intergenic |
| X  | 32099759  | None     | Gm2940<br>(145178 bp)  | Gm2946<br>(30027 bp)     | Intergenic |
| X  | 166584479 | None     | Gm15069<br>(68276 bp)  | Gm15068<br>(54108 bp)    | Intergenic |

**Supplemental Table 4. Abstinence-associated DMRs arising from cocaine self-administration**

Black: protein coding

Blue: processed transcript

Purple: Linc RNA

Gray: transcribed processed pseudogene

Orange: transcribed unprocessed pseudogene

Pink: unprocessed pseudogene

Red: miscellaneous RNA

Green: miRNA

Turquoise: snRNA

Indigo: SNORA

Light green: ribosomal (rRNA)

\*: antisense

\*\* known pseudogene
