# Supplementary material
Source: PubMed Central journal article supplement (PMC4874530)

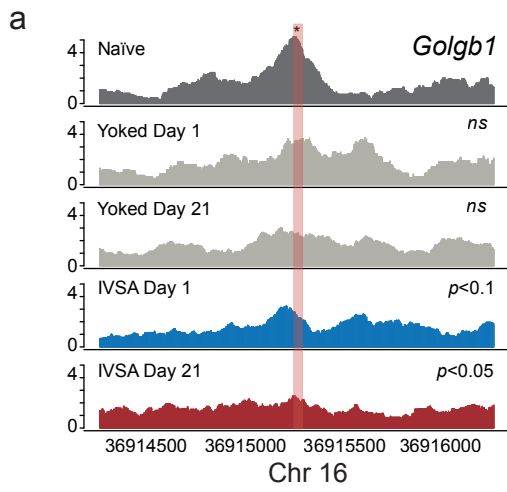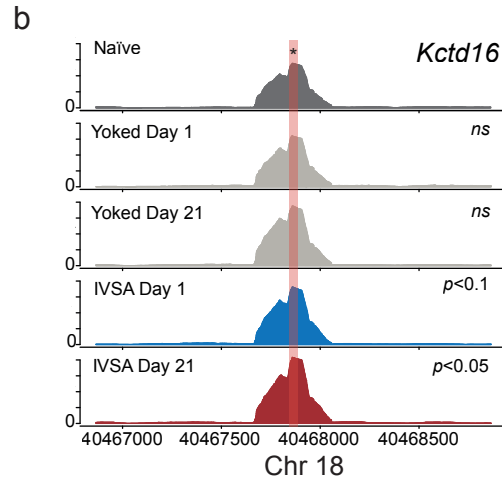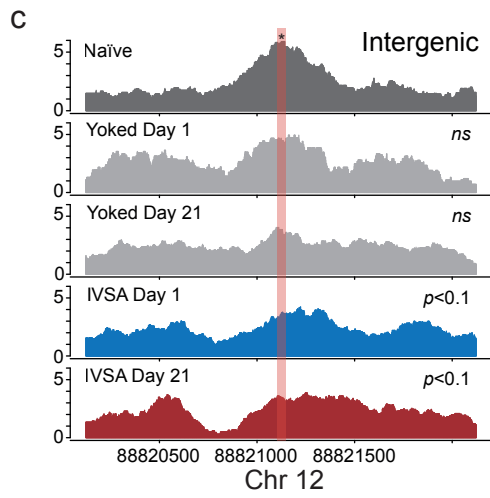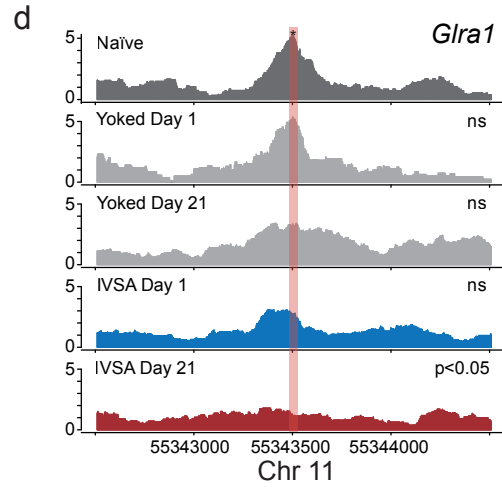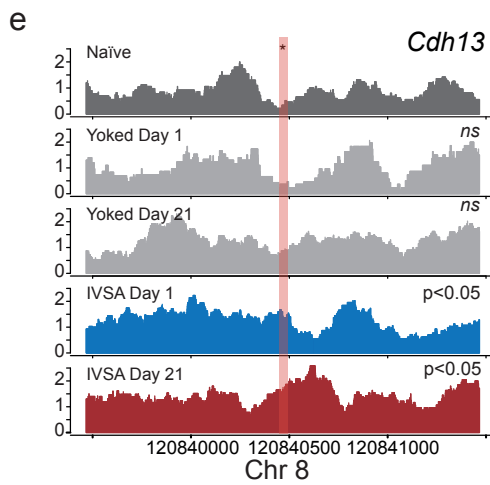

Supplement: NIHMS776094-supplement-Supp_Fig1.pdf [file NIHMS776094-supplement-Supp_Fig1.pdf]

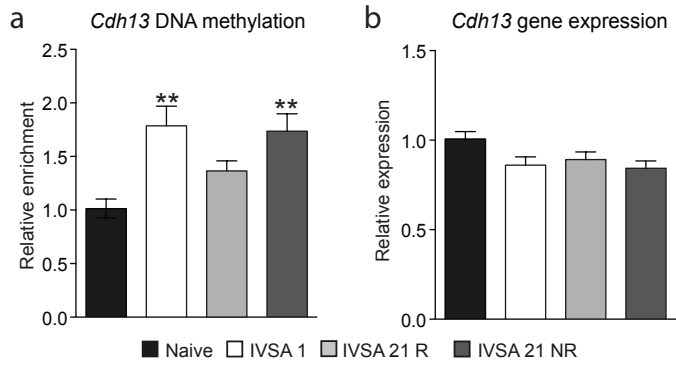

Supplement: NIHMS776094-supplement-Supp_Fig2.pdf [file NIHMS776094-supplement-Supp_Fig2.pdf]
